# Supplementary material for: Active DNA demethylation regulates tracheary element differentiation in Arabidopsis
Source: PubMed Central journal article supplement — Sci Adv. 2020 Jun 26;6(26):eaaz2963. doi: 10.1126/sciadv.aaz2963 (PMC7319731; doi:10.1126/sciadv.aaz2963), 2020-06-26
Supplement: aaz2963_Table_S1.pdf [file aaz2963_Table_S1.pdf]

**Supplementary Table 1. Information for stage-specific marker genes during TE differentiation.**

Tracheary element (TE) differentiation is defined as four main stages, (i) procambium (cell fate determination), (ii) xylem-specific initiation, (iii) secondary cell wall (SCW) formation, and (iv) programmed cell death (PCD) (Turner *et al.*, 2007). Stage (iii) and (iv) act downstream of and are directly regulated by Stage (ii) cascade. Four representative marker genes for each stage were displayed as four rows in fig. S1.

| Stage          | Gene  | Description and Function                                                                                                                                                         | Reference                                                       |
|----------------|-------|----------------------------------------------------------------------------------------------------------------------------------------------------------------------------------|-----------------------------------------------------------------|
| Procambium     | TMO6  | TARGET OF MONOPTEROS (MP);<br>Encoding Dof-type zinc-finger protein;<br>Key auxin signaling factor;<br>Preferentially expressed in<br>procambium precursor and procambial cells. | Donner <i>et al.</i> , 2009<br>Schlereth <i>et al.</i> , 2010   |
|                | AtHB8 | HOMEODOMAIN PROTEIN 8;<br>HD-ZIP III Transcription Factor;<br>Contribute to provascular differentiation.                                                                         | Baima <i>et al.</i> , 1995<br>Donner <i>et al.</i> , 2009       |
|                | PXY   | PHLOEM INTERCALATED WITH XYLEM;<br>LRR-receptor kinase;<br>Stem cell maintenance in procambium.                                                                                  | Fisher & Turner, 2007<br>Hirakawa <i>et al.</i> , 2008          |
|                | PIN7  | PIN-FORMED 7;<br>Direct auxin flow toward the protoxylem.                                                                                                                        | Bishopp <i>et al.</i> , 2011                                    |
| Xylem-specific | VND6  | VASCULAR-RELATED NAC DOMIAN 6/7;                                                                                                                                                 | Kubo <i>et al.</i> , 2005                                       |
|                | VND7  | Transcription factors;<br>Master switches for xylem TE formation.                                                                                                                | Ohashi-Ito <i>et al.</i> , 2010                                 |
|                | VND5  | VASCULAR-RELATED NAC DOMIAN 5;<br>Transcription factor;<br>Redundantly functions with VND6/7                                                                                     | Endo <i>et al.</i> , 2015<br>Yamaguchi <i>et al.</i> , 2008     |
|                | LBD15 | LOB DOMAIN-CONTAINING PROTEIN 15;<br>Transcription factor as the direct target of VND7.                                                                                          | Yamaguchi <i>et al.</i> , 2011<br>Zhong <i>et al.</i> , 2010    |
| SCW formation  | MYB46 | MYB DOMAIN PROTEIN 46/83;                                                                                                                                                        | Zhong <i>et al.</i> , 2007                                      |
|                | MYB83 | Transcription factors directly regulated by VND6/7;<br>Activate SCW biosynthesis.                                                                                                | Zhong <i>et al.</i> , 2012                                      |
|                | IRX3  | IRREGULAR XYLEM 3;<br>Cellulose biosynthesis;<br>Marker for the later stages of TE differentiation.                                                                              | Taylor <i>et al.</i> , 2000, 2003<br>Brown <i>et al.</i> , 2005 |
|                | MYB85 | MYB DOMAIN PROTEIN 85;<br>Transcription factor;<br>Lignin biosynthetic pathway.                                                                                                  | Zhong <i>et al.</i> , 2008<br>Zhou <i>et al.</i> , 2009         |
| PCD            | XCP2  | XYLEM CYSTEINE PEPTIDASE 2;<br>Papain-like cysteine proteinase;<br>Directly activated by both VND6 and VND7;                                                                     | Avci <i>et al.</i> , 2008<br>Funk <i>et al.</i> , 2002          |

| Expressed in TEs and localized to vacuole. |                                                                                                                                                  |                                                                         |
|--------------------------------------------|--------------------------------------------------------------------------------------------------------------------------------------------------|-------------------------------------------------------------------------|
| AtMC9                                      | METACASPASE 9;<br>Encodes a putative metacaspase;<br>Clearance of cellular contents after cell death mediated by papain-like cysteine proteases. | Bollhoner <i>et al.</i> , 2013<br>Escamez <i>et al.</i> , 2016          |
| BFN1                                       | BIFUNCTIONAL NUCLEASE I;<br>Nuclease;<br>Broad role during senescence and PCD.                                                                   | Farage-Barhom <i>et al.</i> , 2008<br>Perez-Amador <i>et al.</i> , 2000 |
| VPE                                        | VACUOLAR PROCESSING ENZYME;<br>Encodes a vacuolar processing enzyme belonging to a novel group of cysteine proteases involved in PCD.            | Gruis <i>et al.</i> , 2004<br>Hatsugai <i>et al.</i> , 2004             |

### Appending References in Table S1 in the alphabetical order:

U. Avci, H. Earl Petzold, I. O. Ismail, E. P. Beers, C. H. Haigler, Cysteine proteases XCP1 and XCP2 aid micro-autolysis within the intact central vacuole during xylogenesis in *Arabidopsis* roots. *Plant J.* **56**, 303-315 (2008).

S. Baima, F. Nobili, G. Sessa, S. Lucchetti, I. Ruberti, G. Morelli, The expression of the AtHB-8 homeobox gene is restricted to provascular cells in *Arabidopsis thaliana*. *Development* **121**, 4171-4182 (1995).

A. Bishopp, H. Help, S. El-Showk, D. Weijers, B. Scheres, J. Friml, E. Benkova, A. P. Mahonen, Y. Helariutta, A mutually inhibitory interaction between auxin and cytokinin specifies vascular pattern in roots. *Curr. Biol.* **21**, 917-926 (2011).

B. Bollhoner, B. Zhang, S. Stael, N. Denance, K. Overmyer, D. Goffner, F. Van Breusegem, H. Tuominen, Post mortem function of AtMC9 in xylem vessel elements. *New Phytol.* **200**, 498-510 (2013).

D. M. Brown, L. A. Zeef, J. Ellis, R. Goodacre, S. R. Turner, Identification of novel genes in *Arabidopsis* involved in secondary cell wall formation using expression profiling and reverse genetics. *Plant Cell* **17**, 2281-2295 (2005).

T. J. Donner, I. Sherr, E. Scarpella, Regulation of preprocambial cell state acquisition by auxin signaling in *Arabidopsis* leaves. *Development* **136**, 3235-3246 (2009).

H. Endo, M. Yamaguchi, T. Tamura, Y. Nakano, N. Nishikubo, A. Yoneda, K. Kato, M. Kubo, S. Kajita, Y. Katayama, M. Ohtani, T. Demura, Multiple classes of transcription factors regulate the expression of VASCULAR-RELATED NAC-DOMAIN7, a master switch of xylem vessel differentiation. *Plant Cell Physiol.* **56**, 242-254 (2015).

S. Escamez, D. Andre, B. Zhang, B. Bollhoner, E. Pesquet, H. Tuominen, METACASPASE9 modulates autophagy to confine cell death to the target cells during *Arabidopsis* vascular xylem

differentiation. *Biol. Open* **5**, 122-129 (2016).

S. Farage-Barhom, S. Burd, L. Sonogo, R. Perl-Treves, A. Lers, Expression analysis of the BFN1 nuclease gene promoter during senescence, abscission, and programmed cell death-related processes. *J. Exp. Bot.* **59**, 3247-3258 (2008).

K. Fisher, S. Turner, PXY, a receptor-like kinase essential for maintaining polarity during plant vascular-tissue development. *Curr. Biol.* **17**, 1061-1066 (2007).

V. Funk, B. Kositsup, C. Zhao, E. P. Beers, The *Arabidopsis* xylem peptidase XCP1 is a tracheary element vacuolar protein that may be a papain ortholog. *Plant Physiol.* **128**, 84-94 (2002).

D. Gruis, J. Schulze, R. Jung, Storage protein accumulation in the absence of the vacuolar processing enzyme family of cysteine proteases. *Plant Cell* **16**, 270-290 (2004).

N. Hatsugai, M. Kuroyanagi, K. Yamada, T. Meshi, S. Tsuda, M. Kondo, M. Nishimura, I. Haranishimura, A plant vacuolar protease, VPE, mediates virus-induced hypersensitive cell death. *Science* **305**, 855-858 (2004).

Y. Hirakawa, H. Shinohara, Y. Kondo, A. Inoue, I. Nakanomyo, M. Ogawa, S. Sawa, K. Ohashiito, Y. Matsubayashi, H. Fukuda, Non-cell-autonomous control of vascular stem cell fate by a CLE peptide/receptor system. *Proc. Natl. Acad. Sci. U.S.A.* **105**, 15208-15213 (2008).

M. Kubo, M. Udagawa, N. Nishikubo, G. Horiguchi, M. Yamaguchi, J. Ito, T. Mimura, H. Fukuda, T. Demura, Transcription switches for protoxylem and metaxylem vessel formation. *Genes Dev.* **19**, 1855-1860 (2005).

K. Ohashi-Ito, Y. Oda, H. Fukuda, *Arabidopsis* VASCULAR-RELATED NAC-DOMAIN6 directly regulates the genes that govern programmed cell death and secondary wall formation during xylem differentiation. *Plant Cell* **22**, 3461-3473 (2010).

M. A. Perezamador, M. L. Abler, E. J. De Rocher, D. M. Thompson, A. Van Hoof, N. D. Lebrasseur, A. Lers, P. J. Green, Identification of BFN1, a bifunctional nuclease induced during leaf and stem senescence in *Arabidopsis*. *Plant Physiol.* **122**, 169-179 (2000).

A. Schlereth, B. Moller, W. Liu, M. Kientz, J. Flipse, E. H. Rademacher, M. Schmid, G. Jurgens, D. Weijers, MONOPTEROS controls embryonic root initiation by regulating a mobile transcription factor. *Nature* **464**, 913-916 (2010).

N. G. Taylor, R. M. Howells, A. K. Huttly, K. Vickers, S. R. Turner, Interactions among three distinct Cesa proteins essential for cellulose synthesis. *Proc. Natl. Acad. Sci. U.S.A.* **100**, 1450-1455 (2003).

N. G. Taylor, S. Laurie, S. R. Turner, Multiple cellulose synthase catalytic subunits are required for cellulose synthesis in *Arabidopsis*. *Plant Cell* **12**, 2529-2539 (2000).

M. Yamaguchi, N. Mitsuda, M. Ohtani, M. Ohme-Takagi, K. Kato, T. Demura, VASCULAR-RELATED NAC-DOMAIN7 directly regulates the expression of a broad range of genes for xylem vessel formation. *Plant J.* **66**, 579-590 (2011).

R. Zhong, C. Lee, Z. H. Ye, Global analysis of direct targets of secondary wall NAC master

switches in *Arabidopsis*. *Mol Plant* **3**, 1087-1103 (2010).

R. Zhong, C. Lee, J. Zhou, R. L. McCarthy, Z. H. Ye, A battery of transcription factors involved in the regulation of secondary cell wall biosynthesis in *Arabidopsis*. *Plant Cell* **20**, 2763-2782 (2008).

R. Zhong, E. A. Richardson, Z. H. Ye, The MYB46 transcription factor is a direct target of SND1 and regulates secondary wall biosynthesis in *Arabidopsis*. *Plant Cell* **19**, 2776-2792 (2007).

R. Zhong, Z. H. Ye, MYB46 and MYB83 bind to the SMRE sites and directly activate a suite of transcription factors and secondary wall biosynthetic genes. *Plant Cell Physiol.* **53**, 368-380 (2012).

J. Zhou, C. Lee, R. Zhong, Z. H. Ye, MYB58 and MYB63 are transcriptional activators of the lignin biosynthetic pathway during secondary cell wall formation in *Arabidopsis*. *Plant Cell* **21**, 248-266 (2009).
