# Supplementary material for: Active DNA demethylation regulates tracheary element differentiation in Arabidopsis
Source: PubMed Central journal article supplement — Sci Adv. 2020 Jun 26;6(26):eaaz2963. doi: 10.1126/sciadv.aaz2963 (PMC7319731; doi:10.1126/sciadv.aaz2963), 2020-06-26
Supplement: aaz2963_Table_S5.pdf [file aaz2963_Table_S5.pdf]

**Supplementary Table 5. Primers and sgRNAs used in this study.**

| Primer name        | Sequence (5'-3')                | Purpose       |
|--------------------|---------------------------------|---------------|
| <i>AtHB-8-f</i>    | TGTCATGTGTTGCTCACTCAAGGC        | Real-time PCR |
| <i>AtHB-8-r</i>    | TTGAAGTGCCACCAACGTCGTC          |               |
| <i>AtMC9-f</i>     | AGGCAGTCCTTGACCACTTGAG          |               |
| <i>AtMC9-r</i>     | TGTGTGCCGATGTCGGAAGTTG          |               |
| <i>BFN1-f</i>      | TCGCTTGTCCACACAAGTATGC          |               |
| <i>BFN1-r</i>      | ACCAGACTTGACGCCTTTGTATCC        |               |
| <i>δVPE-f</i>      | GCATCTCTTGGCTTGAGGACAGTG        |               |
| <i>δVPE-r</i>      | CTGTTCCGAAACGGCATAACATGAG       |               |
| <i>IRX3-f</i>      | CGGTTGTCCAAGGTCTCCTC            |               |
| <i>IRX3-r</i>      | GGGATCAGCAGTGTGTCCA             |               |
| <i>LBD15-f</i>     | AGAAGCTGTCGCCACTTTGA            |               |
| <i>LBD15-r</i>     | GGAGGATGAGCCGTTGTAGG            |               |
| <i>MYB46-f</i>     | TCCTCATCACCCAACACAGC            |               |
| <i>MYB46-r</i>     | ACGGGTGGCTGATCATGTTT            |               |
| <i>MYB83-f</i>     | ACTCGGCTTCCAGGTAGAACAG          |               |
| <i>MYB83-r</i>     | AAGCCGCTTCTTCAATGTCGAG          |               |
| <i>MYB85-f</i>     | TCGATCCTATGACCCATCAACCC         |               |
| <i>MYB85-r</i>     | TCGTCTGGATTGGACGGAATGG          |               |
| <i>PIN7-f</i>      | TGGTGTGTCGAGCATTTAGGAAGC        |               |
| <i>PIN7-r</i>      | TGCCATGGCTCGTACCCTAATG          |               |
| <i>TDR-f</i>       | TCGCTCATCTGAATCCGTCG            |               |
| <i>TDR-r</i>       | AAGCATCTAGTGGCGGCTAC            |               |
| <i>TMO6-f</i>      | TAGCTCTCAGGTGTCCACGTT           |               |
| <i>TMO6-r</i>      | CGAAGATGTGGATCGTTTGT            |               |
| <i>VND5-f</i>      | AGTTCTCCACGACAGTTTCTTCCC        |               |
| <i>VND5-r</i>      | TGAGGCCACAAGGCAATGTCTG          |               |
| <i>VND6-f</i>      | TGGTTTGTGCGCCTTTCAAG            |               |
| <i>VND6-r</i>      | CATTTGCTGCGTGAACCAAGT           |               |
| <i>VND7-f</i>      | TGGTGTGTCGAGCATTTAGGAAGC        |               |
| <i>VND7-r</i>      | TGCCATGGCTCGTACCCTAATG          |               |
| <i>XCP2-f</i>      | TTGGCTCATCAGCCTCTCAGTG          |               |
| <i>XCP2-r</i>      | AAACACGCCGCCGCTATAGAAC          |               |
| <i>AT3G13630-f</i> | AGGCCATTGTGAAGGGAATG            |               |
| <i>AT3G13630-r</i> | GATTTGTGTAGTGTGCTGGTG           |               |
| <i>gROS1-f</i>     | GGCTTTATCGAACTCTCTGAACACAACCTCT | Complementary |
| <i>gROS1-r</i>     | CTAATATTTGACAACAATAGAATTCTTTGG  |               |
| <i>NRPD1</i>       | GAGGCAGCTTACAGCGCGCTGG          | sgRNA         |
| <i>NRPE1</i>       | GGGTTAGTGTCCACAATAGAGG          |               |
